# Supplementary material for: Physiological Properties and Genome Structure of the Hyperthermophilic Filamentous Phage φOH3 Which Infects Thermus thermophilus HB8
Source: PubMed Central journal article supplement (PMC4763002; doi:10.3389/fmicb.2016.00050), 2016-02-23
Supplement: DataSheet1.pdf [file DataSheet1.pdf]

Supplemental Table 1. Bacterial protein identification identified by ESI-MS/MS.  
\* Protein search in bacterial sequence database of NCBI nr

| Band No.    | g number                                                                   | protein description                                                   | prot_score                 | protein MW                 | Unique peptides matched | peptide charge | miss cleavage | peptide score                               | pep_seq                    | modification  |
|-------------|----------------------------------------------------------------------------|-----------------------------------------------------------------------|----------------------------|----------------------------|-------------------------|----------------|---------------|---------------------------------------------|----------------------------|---------------|
| Band 1      | g 499548193                                                                | hypothetical protein [Thermus thermophilus]                           | 353                        | 100832                     | 9                       | 2              | 0             | 55                                          | SSVTASDLPSVR               | Oxidation (M) |
|             |                                                                            |                                                                       |                            |                            |                         | 2              | 0             | 51                                          | FLVSASEGSGWSAR             |               |
|             |                                                                            |                                                                       |                            |                            |                         | 2              | 0             | 30                                          | DGGDDDALETSDDVVR           |               |
|             |                                                                            |                                                                       |                            |                            |                         | 2              | 0             | 28                                          | VSASIEEHAALLYK             |               |
|             |                                                                            |                                                                       |                            |                            |                         | 2              | 0             | 32                                          | FSFGIGESYGQPVK             |               |
|             |                                                                            |                                                                       |                            |                            |                         | 2              | 0             | 28                                          | ADLTYTTAGAYISVNK           |               |
|             |                                                                            |                                                                       |                            |                            |                         | 3              | 1             | 43                                          | QKQPTDLLPITGFGVVR          |               |
|             |                                                                            |                                                                       |                            |                            |                         | 2              | 0             | 38                                          | GCETQNVTELFVMTDADGIAK      |               |
|             |                                                                            |                                                                       |                            |                            |                         | 3              | 0             | 47                                          | VDLGDISPATCAAANDTSGSVYLPQK |               |
|             |                                                                            |                                                                       |                            |                            |                         | Band 2         | g 499548193   | hypothetical protein [Thermus thermophilus] | 307                        |               |
| 2           | 0                                                                          | 57                                                                    | FLVSASEGSGWSAR             |                            |                         |                |               |                                             |                            |               |
| 3           | 0                                                                          | 31                                                                    | WFFYNTHILRLR               |                            |                         |                |               |                                             |                            |               |
| 2           | 0                                                                          | 40                                                                    | DGGDDDALETSDDVVR           |                            |                         |                |               |                                             |                            |               |
| 3           | 0                                                                          | 30                                                                    | VSASIEEHAALLYK             |                            |                         |                |               |                                             |                            |               |
| 2           | 0                                                                          | 50                                                                    | FSFGIGESYGQPVK             |                            |                         |                |               |                                             |                            |               |
| 2           | 0                                                                          | 31                                                                    | GCETQNVTELFVMTDADGIAK      |                            |                         |                |               |                                             |                            |               |
| 3           | 0                                                                          | 38                                                                    | VDLGDISPATCAAANDTSGSVYLPQK |                            |                         |                |               |                                             |                            |               |
| g 499548356 | ABC transporter substrate-binding protein [Thermus thermophilus]           | 133                                                                   | 48146                      | 4                          | 2                       |                | 0             | 50                                          | LALYQYWAAR                 |               |
|             |                                                                            |                                                                       |                            |                            | 2                       |                | 0             | 25                                          | JAPGGVTSYAEER              |               |
|             |                                                                            |                                                                       |                            |                            | 2                       | 0              | 27            | NWPYALGGAEGSPIR                             |                            |               |
|             |                                                                            |                                                                       |                            |                            | 3                       | 0              | 33            | YNGVSEAWTEVHSLTGR                           |                            |               |
|             |                                                                            |                                                                       |                            |                            | 2                       | 0              | 33            | YNGVSEAWTEVHSLTGR                           |                            |               |
| Band 3      | g 499548193                                                                | hypothetical protein [Thermus thermophilus]                           | 310                        | 100832                     | 7                       | 2              | 0             | 37                                          | SSVTASDLPSVR               | Oxidation (M) |
|             |                                                                            |                                                                       |                            |                            |                         | 2              | 0             | 57                                          | FLVSASEGSGWSAR             |               |
|             |                                                                            |                                                                       |                            |                            |                         | 2              | 0             | 45                                          | DGGDDDALETSDDVVR           |               |
|             |                                                                            |                                                                       |                            |                            |                         | 3              | 0             | 50                                          | VSASIEEHAALLYK             |               |
|             |                                                                            |                                                                       |                            |                            |                         | 2              | 0             | 42                                          | FSFGIGESYGQPVK             |               |
|             | 2                                                                          | 0                                                                     | 49                         | GCETQNVTELFVMTDADGIAK      |                         |                |               |                                             |                            |               |
|             | 3                                                                          | 0                                                                     | 30                         | VDLGDISPATCAAANDTSGSVYLPQK |                         |                |               |                                             |                            |               |
|             | g 499548190                                                                | hypothetical protein [Thermus thermophilus]                           | 200                        | 36238                      | 4                       | 2              | 0             | 43                                          | VLYGFLDTDFGDR              |               |
|             |                                                                            |                                                                       |                            |                            |                         | 3              | 1             | 42                                          | GGKVKDGVPGVGTAGTYVLAEP     |               |
|             |                                                                            |                                                                       |                            |                            |                         | 3              | 0             | 47                                          | HYGTGSAGLGGQPVSFQAVLYPQGR  |               |
| 2           |                                                                            |                                                                       |                            |                            |                         | 2              | 67            | KGIDNLKELITNYK                              |                            |               |
| 2           |                                                                            |                                                                       |                            |                            |                         | 0              | 43            | VLYGFLDTDFGDR                               |                            |               |
| Band 4      | g 499548193                                                                | hypothetical protein [Thermus thermophilus]                           | 357                        | 100832                     | 8                       | 2              | 0             | 33                                          | YELVGGDVSK                 | Oxidation (M) |
|             |                                                                            |                                                                       |                            |                            |                         | 2              | 0             | 67                                          | SSVTASDLPSVR               |               |
|             |                                                                            |                                                                       |                            |                            |                         | 2              | 0             | 70                                          | FLVSASEGSGWSAR             |               |
|             |                                                                            |                                                                       |                            |                            |                         | 2              | 0             | 28                                          | DGGDDDALETSDDVVR           |               |
|             |                                                                            |                                                                       |                            |                            |                         | 2              | 0             | 43                                          | VSASIEEHAALLYK             |               |
|             | 2                                                                          | 0                                                                     | 41                         | FSFGIGESYGQPVK             |                         |                |               |                                             |                            |               |
|             | 2                                                                          | 0                                                                     | 42                         | GCETQNVTELFVMTDADGIAK      |                         |                |               |                                             |                            |               |
|             | 2                                                                          | 0                                                                     | 32                         | VDLGDISPATCAAANDTSGSVYLPQK |                         |                |               |                                             |                            |               |
|             | g 480311946                                                                | iron ABC transporter substrate-binding protein [Thermus thermophilus] | 184                        | 38952                      | 4                       | 2              | 0             | 42                                          | AYPNPNMLDAIR               |               |
|             |                                                                            |                                                                       |                            |                            |                         | 2              | 0             | 52                                          | DGDAGNLALVTGALLK           |               |
| 2           |                                                                            |                                                                       |                            |                            |                         | 0              | 50            | YSTAQGLAALDEEGR                             |                            |               |
| 2           |                                                                            |                                                                       |                            |                            |                         | 0              | 41            | SPADLFWANTAGALGASAK                         |                            |               |
| 2           |                                                                            |                                                                       |                            |                            |                         | 0              | 41            | SPADLFWANTAGALGASAK                         |                            |               |
| g 499547028 | phosphate ABC transporter substrate-binding protein [Thermus thermophilus] | 96                                                                    | 35954                      | 3                          | 2                       | 0              | 35            | ISVAFSGTAGAFQK                              |                            |               |
|             |                                                                            |                                                                       |                            |                            | 2                       | 0              | 38            | STGVVELPDEAYR                               |                            |               |
|             |                                                                            |                                                                       |                            |                            | 2                       | 0              | 23            | TGSFFDLPPGTPPLAK                            |                            |               |
|             |                                                                            |                                                                       |                            |                            | 2                       | 0              | 23            | TGSFFDLPPGTPPLAK                            |                            |               |
|             |                                                                            |                                                                       |                            |                            | 2                       | 0              | 23            | TGSFFDLPPGTPPLAK                            |                            |               |
| Band 5      |                                                                            | None                                                                  |                            |                            |                         |                |               |                                             |                            |               |

Supplemental Table 2. Fungal protein identification identified by ESI-MS/MS.  
\* Protein search in predicted expressed protein database of OH3

| Band No. | g number | protein description | prot_score | protein MW | Unique peptides matched | peptide charge | miss cleavage | peptide score | pep_seq                            | modification |
|----------|----------|---------------------|------------|------------|-------------------------|----------------|---------------|---------------|------------------------------------|--------------|
| Band 1   |          | OHOORF4             | 291        | 56881      | 9                       | 2              | 0             | 30            | FAEVONILK                          |              |
|          |          |                     |            |            |                         | 2              | 0             | 41            | QAVTYLDR                           |              |
|          |          |                     |            |            |                         | 2              | 0             | 39            | LNPLAEAWR                          |              |
|          |          |                     |            |            |                         | 2              | 0             | 33            | FPFGIAAIR                          |              |
|          |          |                     |            |            |                         | 2              | 0             | 73            | SAVQDMVVAEIR                       |              |
|          |          |                     |            |            |                         | 2              | 0             | 40            | WYFWSNPYVEVGR                      |              |
|          |          |                     |            |            |                         | 3              | 1             | 22            | LPEWDLNPLAEAWR                     |              |
|          |          |                     |            |            |                         | 3              | 1             | 24            | SPTSPWVTDGQYSDDEEIRK               |              |
|          |          |                     |            |            |                         | 3              | 0             | 25            | GTNPNDPASYPDTPPEQPEENPEPQWPGPPSSGR |              |
|          |          |                     |            |            |                         | 3              | 0             | 25            | GTNPNDPASYPDTPPEQPEENPEPQWPGPPSSGR |              |

No other matches found
